# Supplementary material
Source: PubMed Central journal article supplement (PMC3845193)
Supplement: 1319280110_pnas.201319280SI.pdf [file 1319280110_pnas.201319280SI.pdf]

# Supporting Information

Zhang et al. 10.1073/pnas.1319280110

## SI Materials and Methods

**RNA-seq Data Alignment.** RNA-seq data were aligned to reference genome (University of California at Santa Cruz, UCSC, mm9) using Tophat (v1.3.1) by default parameters (1). Uniquely mapped and properly paired alignments were kept for further analysis. Reads per exon were grouped using RefSeq annotation and thus RPKM (reads per kilobase of exon model per million mapped reads) can be calculated (2). Genes with RPKM > 2 were considered as expressed genes.

**Differential Gene-Expression Analysis.** Differential gene-expression sequence analysis (3) was performed to detect differentially expressed genes. The input count data for each gene was computed by BEDTools (4). Replicates were considered when estimating dispersion for each gene and then negative binomial test was conducted to test differentially expressed genes.

**Alternative Splicing Events Analysis.** Mixture of isoforms (MISO) (5) (v0.4.1 with default parameters) was applied to the aligned RNA-seq data to identify differentially spliced isoforms between WT and spinal muscular atrophy (SMA) samples, which estimates expression at alternative splice-event level by computing  $\Psi$  (percent spliced isoform, PSI), and calculates Bayes factors to measure the differential expression. The alternative splicing events were filtered by the criteria modified from MISO manual: (i) at least one inclusion read, (ii) one exclusion read, such that (iii) the sum of inclusion and exclusion reads is at least 10 and (iv) the  $|\Delta\Psi|$  is at least 0.2, and (v) the Bayes factor is at least 10, and *i-v* are true in one of the samples. Same alternative splicing events are required to be identified in both SMA samples.

**Two-Exon-Skipped and Aberrant Splicing-Event Analysis.** We developed custom pipelines to identify two-exon-skipping and aberrant splicing events by analyzing junction reads outputted from Tophat. For two-exon-skipped events, the coordinates were obtained from AceView database. Junction reads were then extracted accordingly and normalized to total number of mapped reads. We defined the inner junction as the “inclusion junction”

across two skipping exons and the outer junction as the “exclusion junction” connected to the other two exons. We constructed a two-by-two contingency table using the inner junctions and the outer junctions in WT and SMA samples. *P* values were generated by Fisher’s exact test using R ([www.r-project.org](http://www.r-project.org)) and *P* < 0.01 was set as threshold. Similarly, for the aberrant splicing events, we identified aberrant junctions by requiring one splicing site within the canonical site, whereas the other site matched the annotated splicing site. The number of canonical junctions and aberrant junctions in WT and SMA samples were then normalized and used to compute *P* values. For a splicing event to be considered as aberrant, we required at least 20 reads (in SMA) that support each aberrant junction (not annotated in RefSeq, UCSC, AceView, or Ensembl databases), twofold or more of these reads in SMA compared with WT, and *P* < 0.01.

**Gene Ontology and Kyoto Encyclopedia of Genes and Genomes Pathway Analyses of Dysregulated Genes.** We used DAVID Bioinformatics Resources 6.7 (<http://david.abcc.ncifcrf.gov/>) for all of the analysis. For the genes affected in SMA motor neurons (MNs) or white matter (WM), a background corresponding to all genes expressed in the MNs or WM was used.

**RT-PCR and Quantitative RT-PCR.** For all of the semiquantitative RT-PCR and quantitative RT-PCR (RT-qPCR) experiments analyzing mRNAs, we used the synthesized cDNA samples by Ovation RNA-seq System V2. Ten nanograms of cDNA were used in each PCR using Platinum Taq DNA polymerase (Invitrogen). PCR products were resolved in 4.5% Nusieve 3:1 agarose (Lonza) gels and visualized in a Molecular Imager Gel Doc XR system (Bio-Rad). Sequences of primers used in the RT-PCR experiments are listed in Table S1. RT-qPCR experiments were performed on a 7900HT Fast Real-time PCR system (ABI), following the manufacturer’s recommended conditions. mRNA levels were measure using SYBR Green and Taqman Gene Expression Assays (ABI) (Tables S1 and S2), and snRNA levels were measured following procedures previously described (6).

1. Trapnell C, Pachter L, Salzberg SL (2009) TopHat: Discovering splice junctions with RNA-Seq. *Bioinformatics* 25(9):1105–1111.
2. Mortazavi A, Williams BA, McCue K, Schaeffer L, Wold B (2008) Mapping and quantifying mammalian transcriptomes by RNA-Seq. *Nat Methods* 5(7):621–628.
3. Anders S, Huber W (2010) Differential expression analysis for sequence count data. *Genome Biol* 11(10):R106.

4. Quinlan AR, Hall IM (2010) BEDTools: A flexible suite of utilities for comparing genomic features. *Bioinformatics* 26(6):841–842.
5. Katz Y, Wang ET, Airoidi EM, Burge CB (2010) Analysis and design of RNA sequencing experiments for identifying isoform regulation. *Nat Methods* 7(12):1009–1015.
6. Zhang Z, et al. (2008) SMN deficiency causes tissue-specific perturbations in the repertoire of snRNAs and widespread defects in splicing. *Cell* 133(4):585–600.

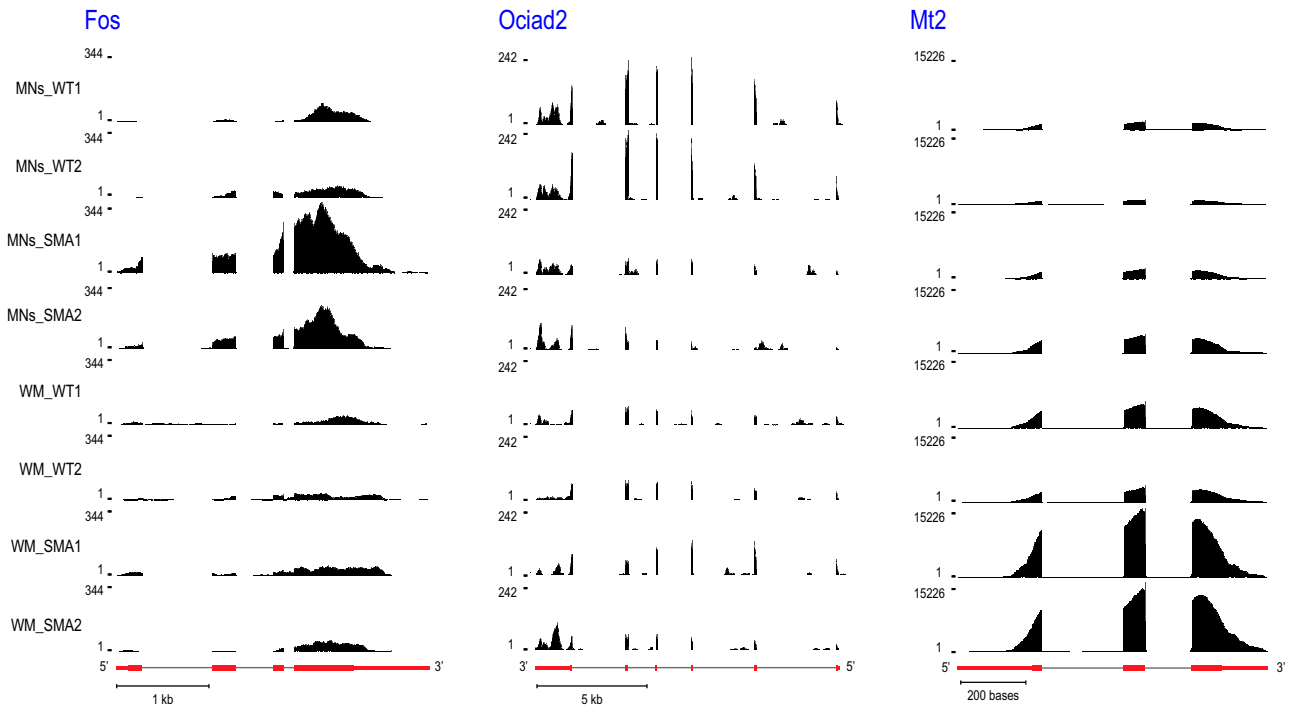

**Fig. S1.** Genome browser visuals of genes affected by differential expression in cell type-specific manner. UCSC Genome Browser view of *Fos*, *Ociad2*, and *Mt2* displaying RNA-seq mapped reads profile, showing MN-specific up-regulation of *Fos* and down-regulation of *Ociad2*, and WM-specific up-regulation of *Mt2* mRNA levels.

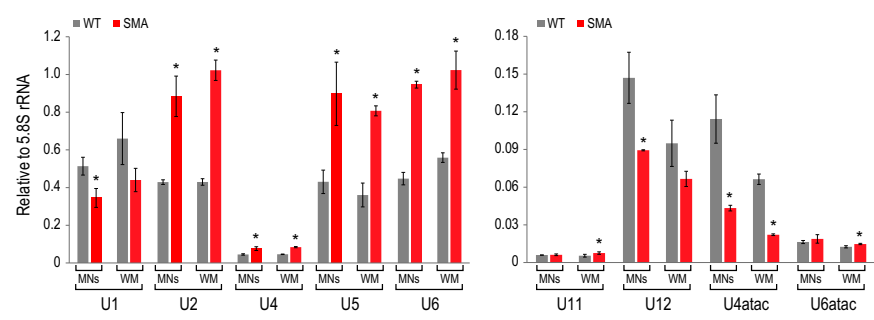

**Fig. S2.** snRNA levels are affected in SMA MNs and WM at postnatal day (P)3. Total RNA from MNs ( $n = 3$ ) and WM ( $n = 3$ ) of P3 SMA mice were purified after laser-capture microdissection (LCM) procedures. snRNA levels in each sample were measured by RT-qPCR. RNA input was normalized to 5.8S rRNA level. Error bars indicate SD (\* $P < 0.05$ , Student  $t$  test).

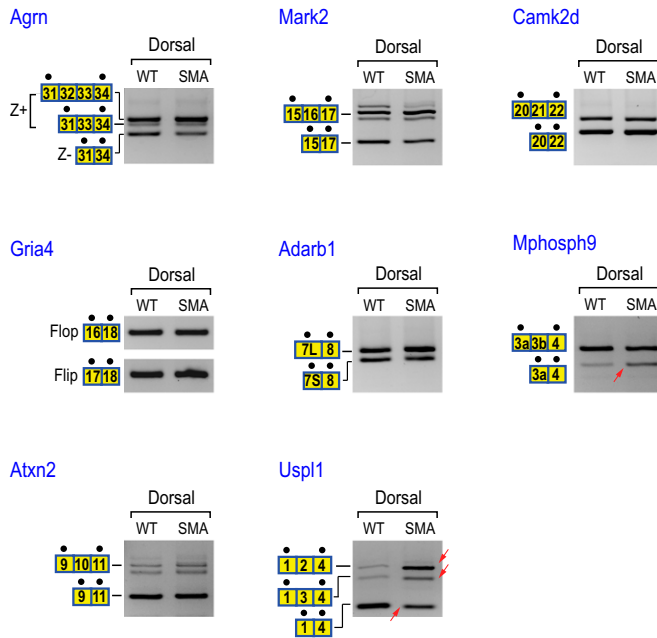

**Fig. S3.** Splicing events detected in SMA MNs and WM are cell-type specific. RT-PCR reactions were performed as described in Fig. 3A, using total RNA purified from the dorsal region (Dorsal) of a WT and an SMA mouse littermate at P1. Most of the splicing changes identified in MNs or WM are not detected in Dorsal, except Mphosph9 and Uspl1.

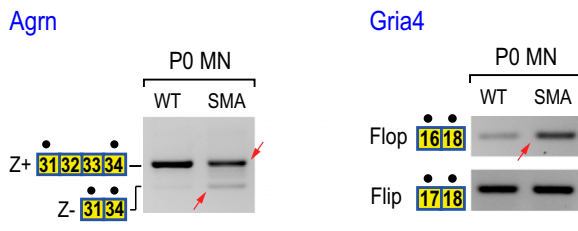

**Fig. S4.** Splicing abnormalities in Agrn and Gria4 are also found in P0 SMA MNs. RT-PCR reactions were performed as described in Fig. 3A, using total RNA purified from the MNs of a WT and an SMA mouse littermate. Splicing changes in Agrn and Gria4 similar to those observed at P1 were detected at P0.

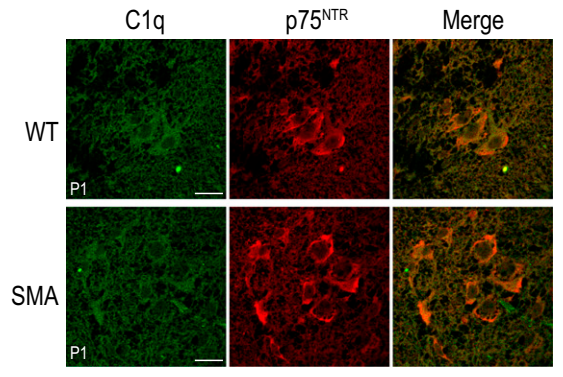

**Fig. S5.** Immunofluorescence staining of C1q did not detect protein level difference between WT and SMA MNs at P1. Immunofluorescence staining of C1q protein complex was performed as described in Fig. 3B; similar levels of weak C1q staining was detected in P1 WT and SMA MNs. (Scale bars, 25  $\mu$ m.)

**Table S1. Sequences of primers used in RT-PCR and SYBR green RT-qPCR experiments**

| Primer name              | Sequence (5'–3')        |
|--------------------------|-------------------------|
| Gapdh LCM F              | AAGGGCTCATGACCACAGTC    |
| Gapdh LCM R              | ACACATTGGGGGTAGGAACA    |
| Chat LCM F               | TGCAACACCTGGTACCTGAA    |
| Chat LCM R               | GCAGGGCTAGAGTTGACTGG    |
| Gfap LCM F               | TCCTTCCAAGTTGTCCATC     |
| Gfap LCM R               | CCAATCAGCCTCAGAGAAGG    |
| p75 <sup>NTR</sup> LCM F | TGCAAAGCCTGCAACC        |
| p75 <sup>NTR</sup> LCM R | CATAGGAGCATCGGCACA      |
| Agrn ex31 F              | TGTCCTGGGGCTTCTCTGG     |
| Agrn ex34 R              | CAACCTTTCCAATCCACAGCACC |
| Agrn ex33 R              | CGGGAATCCAGAGTTTCGGG    |
| Mark2 ex15 F             | CACAAACCGAAGCAGGAAC     |
| Mark2 ex17 R             | TGCTTCGACTGGACACAC      |
| Camk2d ex20 F            | GCGGGATGCCAAAGAC        |
| Camk2d ex22 R            | ATTACACGTAGAACCCTTCAACA |
| Gria4 flop ex16 F        | CGGGGGAGGTGACTC         |
| Gria4 flip ex17 F        | CCCAAGGACTCGGGAAG       |
| Gria4 ex18 R             | CTTCATTCTCTTCGCCTCTG    |
| Dusp22 ex3 F             | CAAGAGATGCAGAACAGTTGA   |
| Dusp22 ex4 R             | GGTTTTGAGATGGTGTGTCTG   |
| Atxn2 ex9 F              | TCAAGAGCTGCTTCTCACA     |
| Atxn2 ex11 R             | AGGAGCAGCTGCTTCAC       |
| Usp1 ex1 F               | GGAGTTCGGGTCCACTG       |
| Usp1 ex4 R               | CTTGCCTTTCGCTCTACAAG    |
| Adarb1 ex7 F             | GGTTCGGCTGAAGGA         |
| Adarb1 ex8 R             | CCTCGCCAGACTCTATTTTC    |
| Mphosph9 ex3a F          | GGGCCACCTGTCAATCA       |
| Mphosph9 ex4 R           | TCTCAGAAAAGAAGCCATTTG   |
| Gria4 Flip qPCR F        | GGTGAATGTGGACCCAAGGA    |
| Gria4 Flip qPCR R        | GCTACGTTGCTCAGGCTCAAG   |
| Gria4 Flop qPCR F        | GGAGGTGACTCCAAGGACAAGA  |
| Gria4 Flop qPCR R        | CCGCCAACAGAATGTAGAAG    |

**Table S2. Taqman gene expression assays used in the RT-qPCR experiments**

| Gene symbol  | Taqman gene expression assay ID |
|--------------|---------------------------------|
| <i>Gapdh</i> | 4352932E                        |
| <i>Etv1</i>  | Mm00514804_m1                   |
| <i>Igf1</i>  | Mm00439560_m1                   |
| <i>Igf2</i>  | Mm00439564_m1                   |
| <i>C1qb</i>  | Mm01179619_m1                   |

**Dataset S1. RNA-seq reads mapping results summary**[Dataset S1](#)**Dataset S2. Differential expressed gene lists**[Dataset S2](#)

Differentially expressed genes identified by RNA-seq analysis are listed on separate work sheets, showing up-regulated and down-regulated genes in MNs or WM, and the genes affected in both cell types. Genes on each work sheet are ranked by fold-change.

### **Dataset S3. Splicing events identified in MNs**

#### [Dataset S3](#)

Genes affected by splicing abnormalities in MNs are listed, representing seven categories as illustrated in Fig. 2B.

### **Dataset S4. Splicing events identified in WM**

#### [Dataset S4](#)

Genes affected by splicing abnormalities in WM are listed, representing seven categories as illustrated in Fig. 2B.

### **Dataset S5. Overlapping between genes affected by differential expression and alternative splicing**

#### [Dataset S5](#)

Genes affected by both differential expression (DE) and alternative splicing (AS) are listed on separate work sheets, showing overlap between DE and AS in MNs and WM on the first 4 work sheets. The fifth work sheet shows overlap of genes affected by AS in MNs and WM.

### **Dataset S6. Splicing events identified in genes containing U12 introns**

#### [Dataset S6](#)

Genes affected by splicing are searched against U12DB, and genomic coordinates of the U12 introns and the regions affected by splicing are also listed. The genes affected in MNs and WM are listed on the first and second work sheet, respectively. None of the regions affected by splicing overlap with locations of the U12 introns.
